# Supplementary material for: Interactions of stealth conjugated polymer nanoparticles with human whole blood
Source: Royal Society of Chemistry journal article supplement (doi:10.1039/c4tb01822b), 2015-01-01
Supplement: c4tb01822b1.pdf [file c4tb01822b1.pdf]

Supplementary information: Ahmad Khanbeigi *et al.*

Figure S1

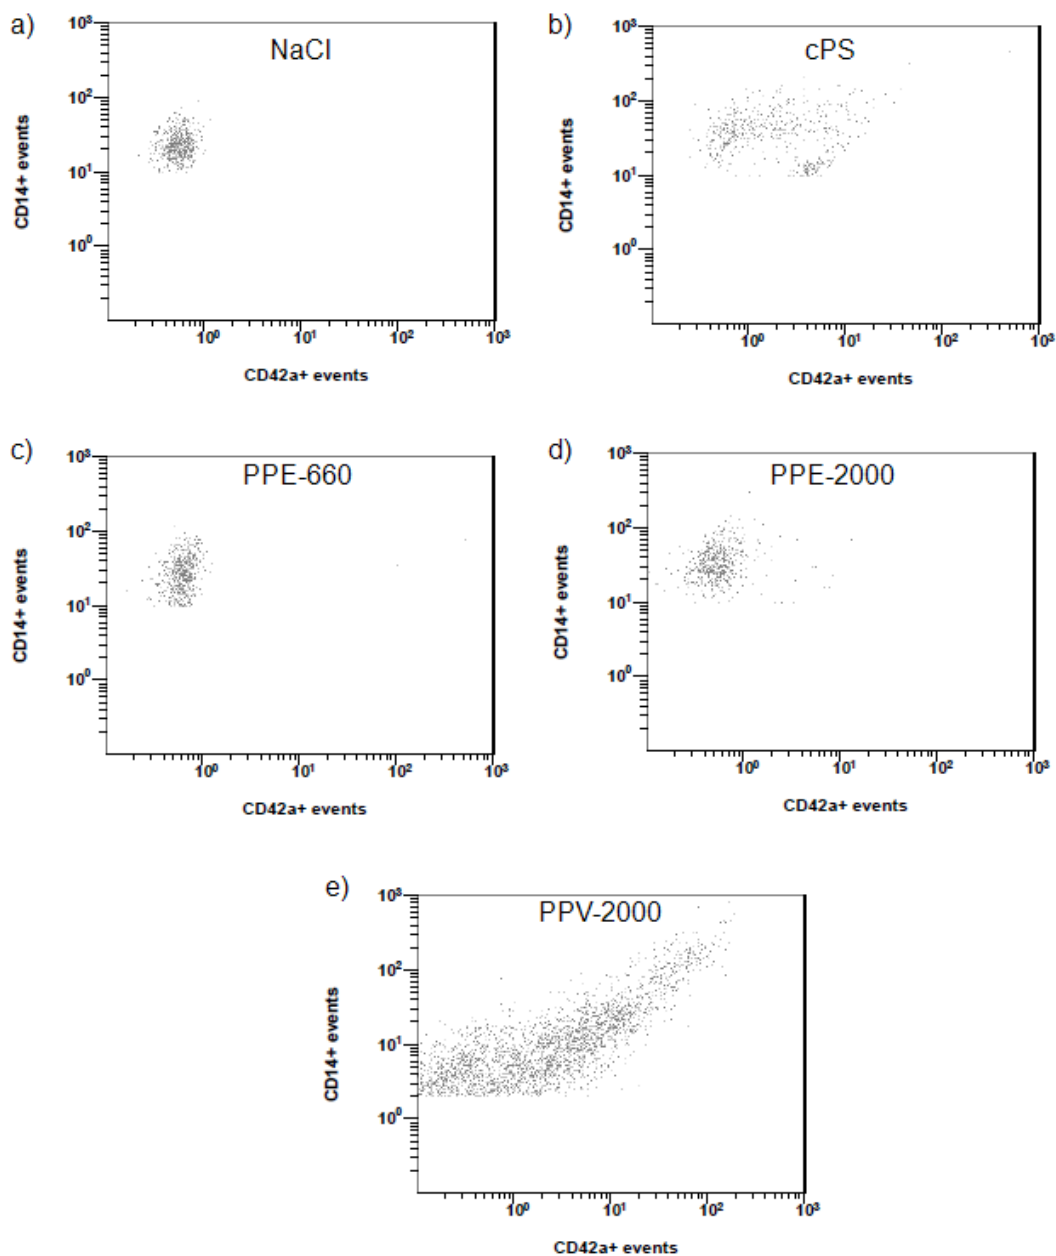

Figure S1. Representative graphs from single blood donors depict platelet monocyte adhesion events whereby monocytes expressing CD14 are counted and the levels of the platelet marker, CD42a are shown following incubation with (a) NaCl, (b) cPS, (c) PPE-660 and (d) PPE-2000 ( $300 \mu\text{g mL}^{-1}$ ). (e) Cell-associated fluorescence following incubation with the red-emitting PPV-2000 nanoparticles shows that the CPN photoluminescence masks the fluorescent labels attached to the CD14 and CD42a antibodies, making it impossible to detect the antibody signal with this method. Due to the broad emission spectrum of the PPV polymer (see Figure 3), fluorescence overlap was observed across the range of most commercially available fluorescently labelled antibodies.
